# Supplementary material for: Layered double hydroxide decorated with Ag nanodendrites as an enhanced sensing platform for voltammetric determination of pyrazinamide
Source: Royal Society of Chemistry journal article supplement (doi:10.1039/c7nj04544a), 2017-12-27
Supplement: c7nj04544a1.pdf [file c7nj04544a1.pdf]

## **Supporting information**

# **Layered double hydroxide decorated with Ag nanodendrites as enhanced sensing platform for voltammetric determination of pyrazinamide**

Roghayeh Amini, Karim Asadpour–Zeynali\*

*Department of Analytical Chemistry, Faculty of Chemistry, University of Tabriz, Tabriz 51666–  
16471, Iran*

**Fig. S1** XRD pattern of AgNDs/LDH/GCE

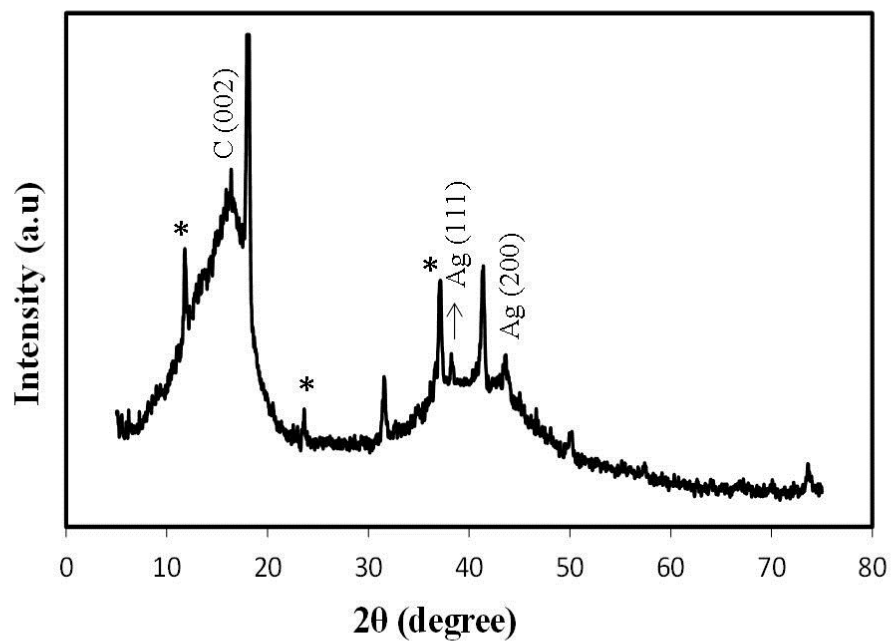

Fig. S1 presents the XRD pattern of AgNDs/LDH/GCE. Symbols of asterisk denote basal reflections from Zn–Al LDH. The peaks obtained at 38.23° and 43.64° can be assigned to diffraction from the (111), and (200) planes, respectively, of the face-centered cubic lattice of Ag (0)<sup>1</sup>. Moreover, the (002) peak is attributed to the glassy carbon<sup>2</sup>.

**Table S1**

The influences of some organic ions and important biological substances on the peak currents of  $5.0 \times 10^{-5}$  mol L<sup>-1</sup> PZA in 0.1 M PBS (pH 7)

| Interferences                 | Concentration (mol L <sup>-1</sup> ) | Signal change of PZA |
|-------------------------------|--------------------------------------|----------------------|
| K <sup>+</sup>                | $7.5 \times 10^{-3}$                 | 2.2%                 |
| Na <sup>+</sup>               | $7.5 \times 10^{-3}$                 | -3.4%                |
| Mg <sup>2+</sup>              | $7.5 \times 10^{-3}$                 | 2.8%                 |
| Cl <sup>-</sup>               | $7.5 \times 10^{-3}$                 | -1.9%                |
| SO <sub>4</sub> <sup>2-</sup> | $7.5 \times 10^{-3}$                 | -3.1%                |
| ascorbic acid                 | $7.5 \times 10^{-3}$                 | -4.9%                |
| glucose                       | $7.5 \times 10^{-3}$                 | 2.4%                 |
| uric acid                     | $2.5 \times 10^{-3}$                 | 3.8%                 |
| L-tyrosine                    | $1.25 \times 10^{-3}$                | -3.3%                |
| isoniazid                     | $2.5 \times 10^{-4}$                 | 4.1%                 |

**References:**

1. A. Kumaravel, M. Chandrasekaran, *Sens. Actuators B: Chem.*, 2012, 174, 380-388.
2. H. J. Cho, K. W. Lee, C. E. Lee, *Curr. Appl. Phys.* 2013, 13, 2055-2058.
